# Supplementary material
Source: PubMed Central journal article supplement (PMC3321742)
Supplement: NIHMS360347-supplement-1_si_001.pdf [file NIHMS360347-supplement-1_si_001.pdf]

## SUPPORTING INFORMATION

Dual Peptide Nucleic Acid- and Peptide-functionalized Shell Crosslinked Nanoparticles

Designed to Target mRNA toward the Diagnosis and Treatment of Acute Lung Injury

*Ritu Shrestha,<sup>†</sup> Yuefei Shen,<sup>‡</sup> Kevin A. Pollack,<sup>†</sup> John-Stephen A. Taylor,<sup>\*,‡</sup> and Karen L. Wooley<sup>\*,†</sup>*

<sup>†</sup>Departments of Chemistry and Chemical Engineering , Texas A&M University, P.O. Box 30012, College Station, Texas 77842-3012, USA

<sup>‡</sup>Department of Chemistry, Washington University in Saint Louis, Saint Louis, Missouri 63130, USA

Supplementary Tables and Figures.

Table S1. MALDI data for PNAs

|            |                                                                | Calc. Mass (M+1) | Obsvd. Mass (M+1) |
|------------|----------------------------------------------------------------|------------------|-------------------|
| iNOS-240   | 5'- TGT CCT TTT CCT CTT TCA-K4 -3'                             | 5267.3           | 5268.6            |
| iNOS-240mm | 5'- TGT CCT <u>CCT</u> <u>TTT</u> CTT TCA-K4 -3'               | 5267.3           | 5268.5            |
| iNOS-480   | 5'- TGA AAT CCG ATG TGG CCT-K4-3'                              | 5427.3           | 5428.3            |
| iNOS-480mm | 5'- <u>TAG</u> AAT <u>CCA</u> <u>GTG</u> <u>GTG</u> CCT-K4- 3' | 5427.3           | 5432.5            |

Table S2. MALDI data for maleimide-PNAs

|             |                                         | Calcd. Mass (M+1) | Obsvd. Mass (M+1) |
|-------------|-----------------------------------------|-------------------|-------------------|
| iNOS-240    | 5'-Maleimide-TGT CCT TTT CCT CTT TCA-3  | 4906.7            | 4909.2            |
| iNOS-240mm  | 5'-Maleimide- TGT CCT CCT TTT CTT TCA-3 | 4906.7            | 4906.9            |
| iNOS-480    | 5'-Maleimide- TGA AAT CCG ATG TGG CCT-3 | 5063.8            | 5064.0            |
| iNOS-480 mm | 5'-Maleimide- TAG AAT CCA GTG GTG CCT-3 | 5063.8            | 5067.3            |

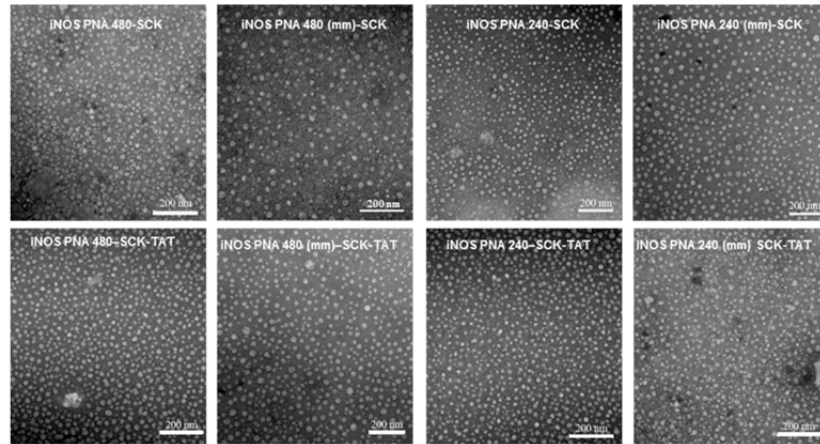

**Figure S1.** TEM images of iNOS PNA-SCK conjugates with and without TAT.

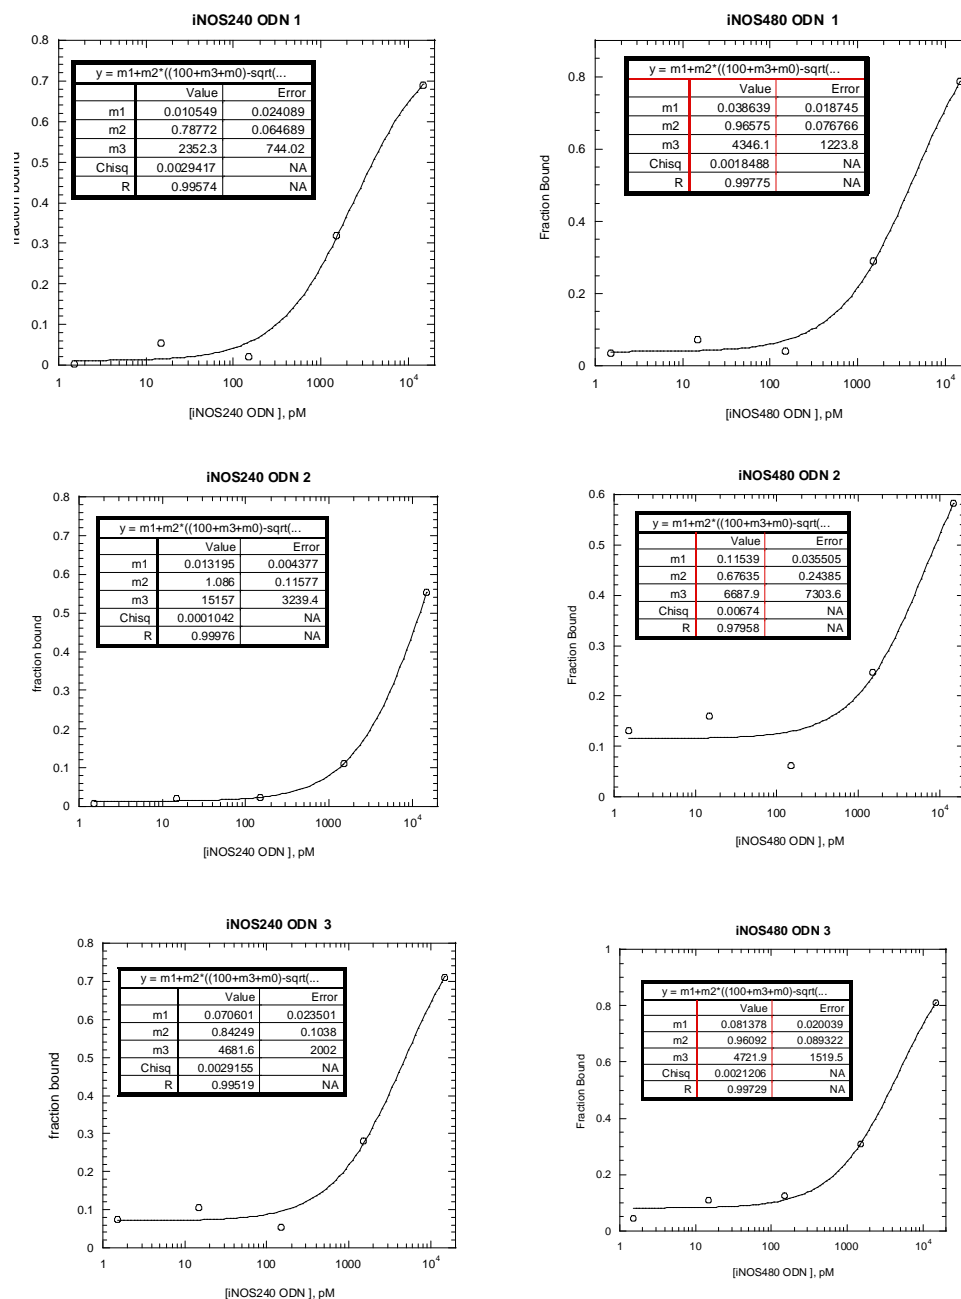

**Figure S2.** Determination of ODN 240 and 480 binding affinity for iNOS mRNA. Fits of fraction ODN bound to the iNOS mRNA from a Dynabead binding assay to equation 1) as described in the experimental section. The concentration of ODN was 100 pM.

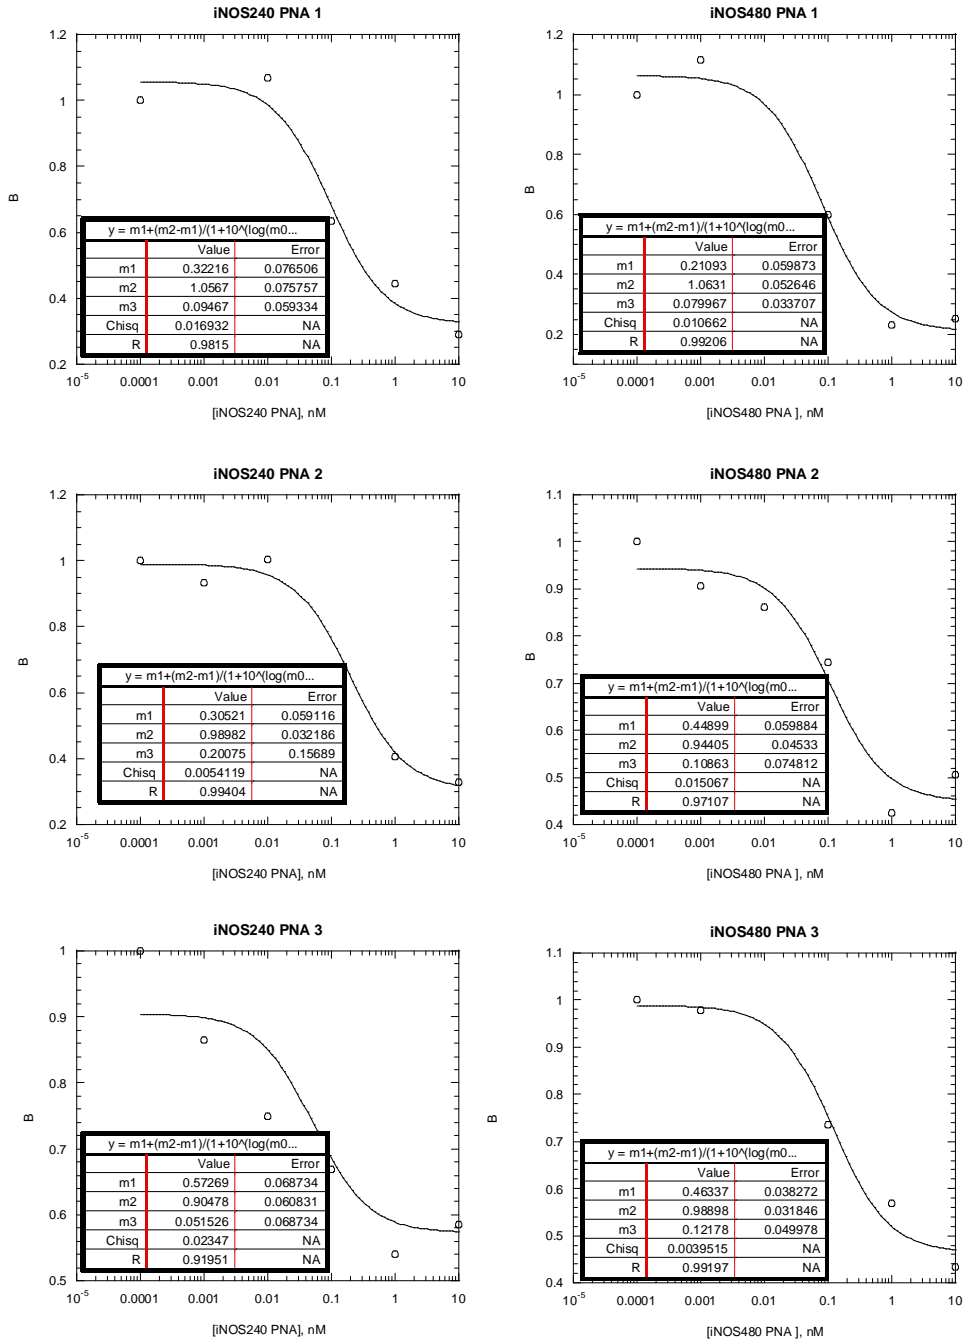

**Figure S3.** Determination of PNA 240 and 480 binding affinity for iNOS mRNA through a Dynabead competition assay as described in the experimental section. The fraction of mRNA (10 pM) bound to 5'-radiolabeled ODN (1 nM) as a function of PNA concentration (nM) was fit to equation 2) to determine the  $IC_{50}$ . The  $K_d$  for PNA binding was then determined from the  $K_d$  for the ODN and the  $IC_{50}$  for the PNA according to equation 3).

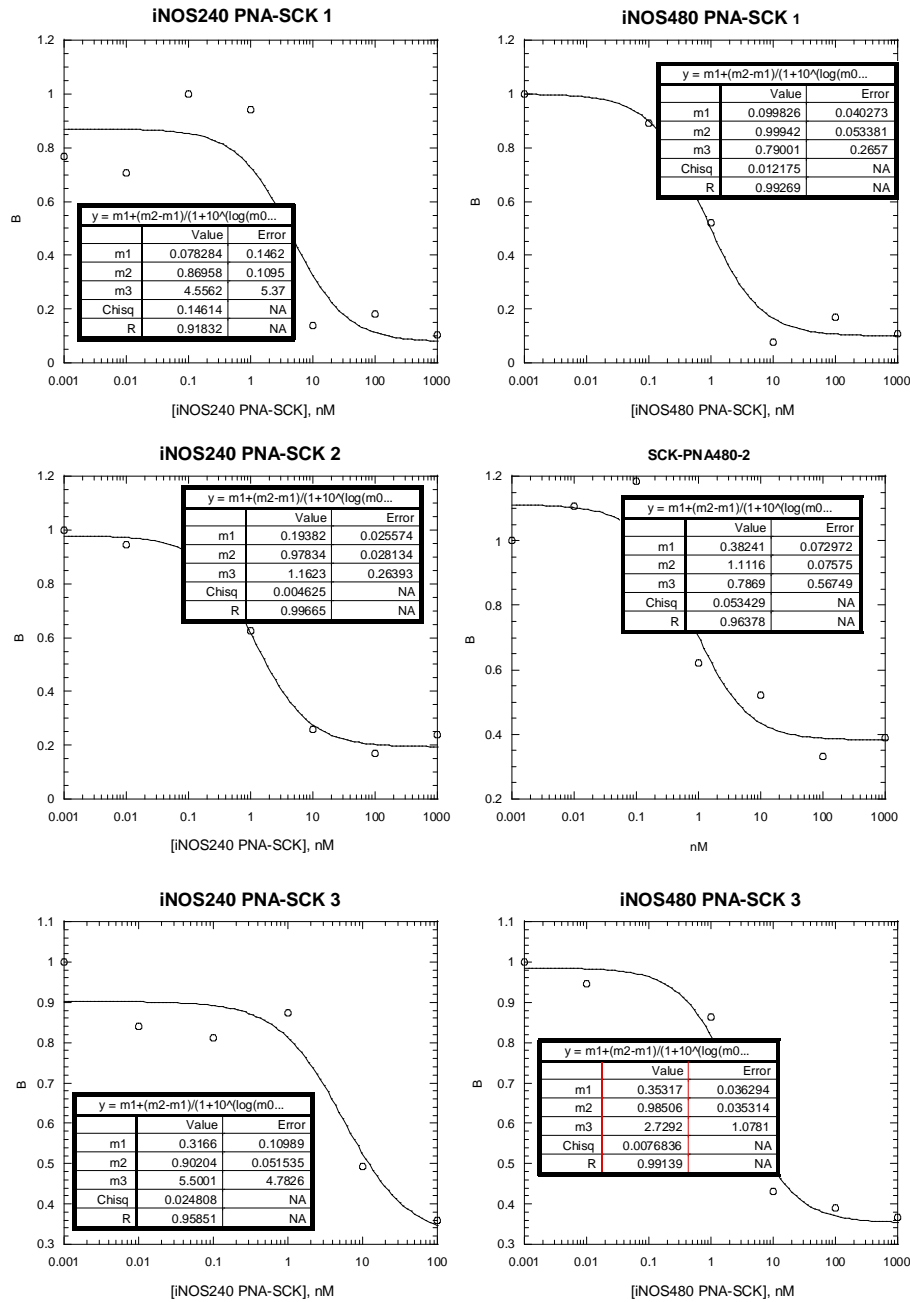

**Figure S4.** Determination of SCK-PNA 240 and 480 binding affinity for iNOS mRNA through a Dynabead competition assay as described in the experimental section. The fraction of mRNA (10 pM) bound to 5'-radiolabeled ODN (1 nM) as a function of SCK-PNA concentration (nM) was fit to equation 2) to determine the  $IC_{50}$ . The  $K_d$  for SCK-PNA binding was then determined from the  $K_d$  for the ODN and the  $IC_{50}$  for the SCK-PNA according to equation 3).

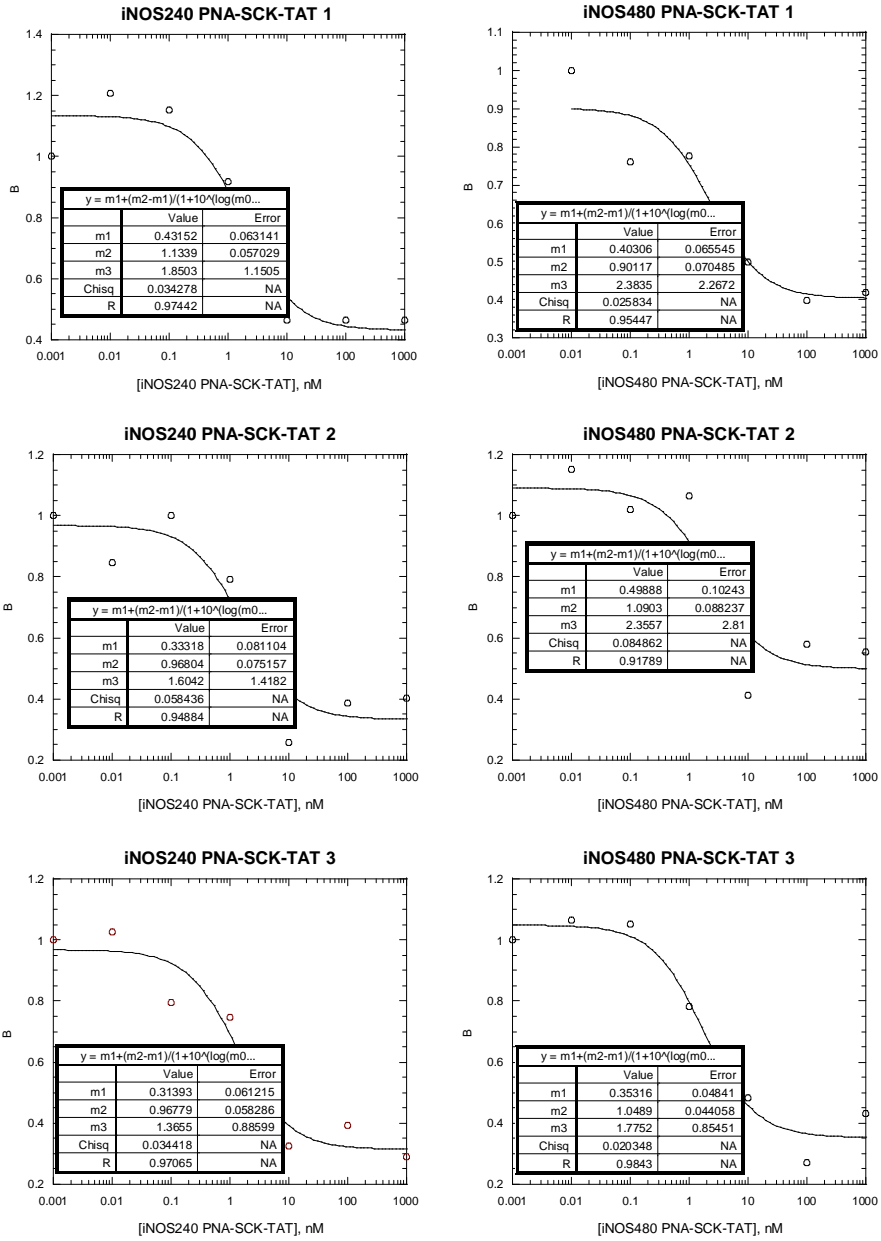

**Figure S5.** Determination of TAT-SCK-PNA 240 and 480 binding affinity for iNOS mRNA through a Dynabead competition assay as described in the experimental section. The fraction of mRNA (10 pM) bound to 5'-radiolabeled ODN (1 nM) as a function of TAT-SCK-PNA concentration (nM) was fit to equation 2) to determine the IC50. The  $K_d$  for TAT-SCK-PNA binding was then determined from the  $K_d$  for the ODN and the IC50 for the TAT-SCK-PNA according to equation 3).
